# Supplementary material for: Sina and Sinb genes in triticale do not determine grain hardness contrary to their orthologs Pina and Pinb in wheat
Source: PubMed Central journal article supplement (PMC4222565; doi:10.1186/1471-2229-13-190), 2013-11-26
Supplement: 1471-2229-13-190-S1.pdf [file 1471-2229-13-190-S1.pdf]

Sina: Wanad / Secale cereale

|            |                                                     |     |
|------------|-----------------------------------------------------|-----|
| Wanad      | ATGAAGGCCTTCTTCTTCGTAGCCCTCCTTGCTCTGGTAGCGAGCACCGC  | 50  |
| AJ249932.1 | .....C.....C..A...GA..G.....                        | 50  |
| DQ269850.1 | .....                                               | 50  |
| Wanad      | CTTTGCGCAATATAGCGAAGTTG---GCAGTTACGATGTTGCCGGCGGGG  | 97  |
| AJ249932.1 | .....TTG.....T.....                                 | 100 |
| DQ269850.1 | .....---                                            | 97  |
| Wanad      | GTGGTGCTCAACAATGCCCTCTAGAGACAAAGCTAAACTCATGCAGGAAT  | 147 |
| AJ249932.1 | .....G.....T.....                                   | 150 |
| DQ269850.1 | .....T...                                           | 147 |
| Wanad      | TACCTGCTAGAAAGATGCTCAACCATGAAGGATTTCCCGGTGACCTGGCA  | 197 |
| AJ249932.1 | .....TC.....G.....C.....G                           | 200 |
| DQ269850.1 | .....                                               | 197 |
| Wanad      | GTGGTGGAATGGTGGAAAGGGAGGTTGTCAAGAGCTCCTTGGGGAGTGTT  | 247 |
| AJ249932.1 | T.....                                              | 250 |
| DQ269850.1 | .....                                               | 247 |
| Wanad      | GCAGCCAGCTCGGCCAAATGCCACCGCAATGCCGCTGCAACATCATCCAG  | 297 |
| AJ249932.1 | ....T.G.....                                        | 300 |
| DQ269850.1 | .....G.....                                         | 297 |
| Wanad      | GGGTCAATCCAAGGCGATCTCGGTGGCATCTTCGGATTTTCAGCGTGACCG | 347 |
| AJ249932.1 | .....T..                                            | 350 |
| DQ269850.1 | .....A.....                                         | 347 |
| Wanad      | GGCAAGCAAAGTGATACAAGAAGCCAAGAACCTGCCGCCAAGTGCAACC   | 397 |
| AJ249932.1 | .....G.....                                         | 400 |
| DQ269850.1 | .....                                               | 397 |
| Wanad      | AGGGCCCTGCCTGCAACATCCCCGGCCCTAGTGGCTATTACTGGTGA     | 444 |
| AJ249932.1 | .....C.....A...T.....                               | 447 |
| DQ269850.1 | .....T.....                                         | 444 |

**AJ249932.1** - Gautier,M.F., Cosson,P., Guirao,A., Alary,R. and Joudrier,P. Puroindoline genes are highly conserved in diploid ancestor wheats and related species but absent in tetraploid Triticum species. Plant Sci. 153, 81-91 (2000)

**DQ269850.1** - Massa,A.N. and Morris,C.F. Molecular evolution of the puroindoline-a, puroindoline-b, and grain softness protein-1 genes in the tribe Triticeae. J. Mol. Evol. 63 (4), 526-536 (2006)

*Sinb*:            Wanad / *Secale cereale*

|            |                                                      |     |
|------------|------------------------------------------------------|-----|
| Wanad      | ATGAAGACCTGCTTATTCTCCTAGCTCTCCTTGCTCTTGTAGCGAGCAC    | 50  |
| AY667061.1 | .....---.....                                        | 47  |
| AY667062.1 | .....---.....                                        | 47  |
| DQ269886.1 | .....                                                | 50  |
| Wanad      | AACCTTGGCGCAATACTCAGAAGTTGGCGGCTGGTACAATGAAGTTGGCG   | 100 |
| AY667061.1 | .....                                                | 97  |
| AY667062.1 | .....                                                | 97  |
| DQ269886.1 | .....                                                | 100 |
| Wanad      | GAGGAGGTGGTGTCTCAACAATGCCCGCTGGAGCGGCCGAAGCTAAGCTCT  | 150 |
| AY667061.1 | .....C.....                                          | 147 |
| AY667062.1 | .....C.....                                          | 147 |
| DQ269886.1 | .....C.....                                          | 150 |
| Wanad      | TGCATGGATTACGTGATGGAGCGGTGTTTCACAATGAAGGATTTTCCAGT   | 200 |
| AY667061.1 | .....                                                | 197 |
| AY667062.1 | .....                                                | 197 |
| DQ269886.1 | .....                                                | 200 |
| Wanad      | CACTTGGCCCACGAGATGGTGGAAAGGGCGGTTGTGAGCACGAGGTTCCGGG | 250 |
| AY667061.1 | .....                                                | 247 |
| AY667062.1 | .....                                                | 247 |
| DQ269886.1 | .....                                                | 250 |
| Wanad      | AGAAGTGTTGCAATCAGCTGAGTCAGATAGCACCCACAGTGTGCGCTGCGAT | 300 |
| AY667061.1 | .....                                                | 297 |
| AY667062.1 | .....                                                | 297 |
| DQ269886.1 | .....                                                | 300 |
| Wanad      | TCTATCCGAGGAATGATCCAAGGCAAGTTCGGAGGCTTCTTCGGCATTG    | 350 |
| AY667061.1 | .....                                                | 347 |
| AY667062.1 | .....A.....                                          | 347 |
| DQ269886.1 | .....A.....                                          | 350 |
| Wanad      | GCGAGGTGATGTATTCAAACAAACTCAAAGGGCCCAGAGCCTCCCCTCGA   | 400 |
| AY667061.1 | .....                                                | 397 |
| AY667062.1 | .....G.....                                          | 397 |
| DQ269886.1 | .....G.....                                          | 400 |
| Wanad      | AGTGCAACATGGGAGCCGACTGCAAGTTCCTGGTGGCTATTACTGGTGA    | 450 |
| AY667061.1 | .....                                                | 447 |
| AY667062.1 | .....C.....                                          | 447 |
| DQ269886.1 | .....C.....                                          | 450 |

**AY667061.1** - Simeone, M.C. and Lafiandra, D. Isolation and characterization of friabilin genes in rye. *J. Cereal Sci.* 41 (1), 115-122 (2005)

**AY667062.1** - Simeone, M.C. and Lafiandra, D. Isolation and characterization of friabilin genes in rye. *J. Cereal Sci.* 41 (1), 115-122 (2005)

**DQ269886.1** - Massa, A.N. and Morris, C.F. Molecular evolution of the puroindoline-a, puroindoline-b, and grain softness protein-1 genes in the tribe Triticeae. *J. Mol. Evol.* 63 (4), 526-536 (2006)

Figure S1. Alignment of the *Sina* and *Sinb* sequences of cv. Wanad with others deposited in GenBank by DNASTAR Lasergene software.
