# Supplementary material for: Sina and Sinb genes in triticale do not determine grain hardness contrary to their orthologs Pina and Pinb in wheat
Source: PubMed Central journal article supplement (PMC4222565; doi:10.1186/1471-2229-13-190), 2013-11-26
Supplement: 1471-2229-13-190-S2.pdf [file 1471-2229-13-190-S2.pdf]

Pina-D1a / Sina Wanad (seq1 - KC784350)

|          |                                                     |     |
|----------|-----------------------------------------------------|-----|
| 850-1296 | ATGAAGGCCCTCTTCCTCATAGGACTGCTTGCTCTGGTAGCGAGCACCGC  | 50  |
| Seq1     | .....T.....T..G...CC..C.....                        | 50  |
| 850-1296 | CTTTGCGCAATATAGCGAAGTTGTTGGCAGTTACGATGTTGCTGGCGGGG  | 100 |
| Seq1     | .....---                                            | 97  |
| 850-1296 | GTGGTGTCTCAACAATGCCCTGTAGAGACAAAGCTAAATTCATGCAGGAAT | 150 |
| Seq1     | .....C.....C.....                                   | 147 |
| 850-1296 | TACCTGCTAGATCGATGCTCAACGATGAAGGATTTCCCGGTCACCTGGCG  | 200 |
| Seq1     | .....AA.....C.....G.....A                           | 197 |
| 850-1296 | TTGGTGGAAATGGTGGAAAGGGAGGTTGTCAAGAGCTCCTTGGGGAGTGTT | 250 |
| Seq1     | G.....                                              | 247 |
| 850-1296 | GCAGTCGGCTCGGCCAAATGCCACCGCAATGCCGCTGCAACATCATCCAG  | 300 |
| Seq1     | ....C.A.....                                        | 297 |
| 850-1296 | GGGTCAATCCAAGGCGATCTCGGTGGCATTCTCGGATTTTCAGCGTGATCG | 350 |
| Seq1     | .....C..                                            | 347 |
| 850-1296 | GGCAAGCAAAGTGATACAAGAAGCCAAGAACCTGCCGCCAGGTGCAACC   | 400 |
| Seq1     | .....A.....                                         | 397 |
| 850-1296 | AGGGCCCTCCCTGCAACATCCCCGGCACTATTGGCTATTACTGGTGA     | 447 |
| Seq1     | .....G.....C...G.....                               | 444 |

Pinb-D1a / Sinb Wanad (seq2 - KC784351)

|         |                                                    |     |
|---------|----------------------------------------------------|-----|
| 274-720 | ATGAAGACCT---TATTCCTCCTAGCTCTCCTTGCTCTTGTAGCGAGCAC | 47  |
| Seq2    | .....GCT.....                                      | 50  |
| 274-720 | AACCTTCGCGCAATACTCAGAAGTTGGCGGCTGGTACAATGAAGTTGGCG | 97  |
| Seq2    | .....G.....                                        | 100 |
| 274-720 | GAGGAGGTGGTTCTCAACAATGTCCGCAGGAGCGGCCGAAGCTAAGCTCT | 147 |
| Seq2    | .....G.....C...T.....                              | 150 |
| 274-720 | TGCAAGGATTACGTGATGGAGCGATGTTTCACAATGAAGGATTTTCCAGT | 197 |
| Seq2    | ....T.....G.....                                   | 200 |
| 274-720 | CACCTGGCCACAAAATGGTGGAAAGGGCGGCTGTGAGCATGAGGTTCCGG | 247 |
| Seq2    | ...T.....G.G.....T.....C.....                      | 250 |
| 274-720 | AGAAGTGCTGCAAGCAGCTGAGCCAGATAGCACCACAATGTCGCTGTGAT | 297 |
| Seq2    | .....T.....T.....T.....G.....C...                  | 300 |
| 274-720 | TCTATCCGGCGAGTGATCCAAGGCAGGCTCGGTGGCTTCTTGGGCATTTG | 347 |
| Seq2    | .....AG..A.....A.T...A.....C.....                  | 350 |
| 274-720 | GCGAGGTGAGGTATTCAAACAACCTCAGAGGGCCAGAGCCTCCCCTCAA  | 397 |
| Seq2    | .....T.....AC...A.....G.                           | 400 |
| 274-720 | AGTGCAACATGGGCGCCGACTGCAAGTTCCTAGTGGCTATTACTGGTGA  | 447 |
| Seq2    | .....A.....G.....                                  | 450 |

Figure S2. Alignment of the *Sina* and *Sinb* sequences of cv. Wanad with *Pina* and *Pinb* by DNASTAR Lasergene software.
