# Supplementary material for: Sina and Sinb genes in triticale do not determine grain hardness contrary to their orthologs Pina and Pinb in wheat
Source: PubMed Central journal article supplement (PMC4222565; doi:10.1186/1471-2229-13-190), 2013-11-26
Supplement: 1471-2229-13-190-S3.pdf [file 1471-2229-13-190-S3.pdf]

SINA cv. Wanad

AGO65289.1 MKAFFFVALLALVASTAFAQYSEVGSYDVAGGGGAQQCPLETKLNSCRNYLLERCSTMK 59  
 ABB88759.1 MKAFFFVALLALVASTAFAQYSEVGSYDVAGGGGAQQCPLETKLNSCRNYLLERCSTMK 59  
 AER62832.1 MKAFFLIGLLALVASTAFAQYSEVGSYDVAGGGGAQQCPLETKLNSCRNYLLDRCSTMK 60  
 ABD72477.1 MKAFLIGLLALVASTAFAQYSEVGSYDVAGGGGAQQCPLETKLNSCRNYLLDRCSTMK 60  
 ABB52757.1 -----DVAGGGGAQQCPLETKLNSCRNYLLDRCSTMK 32

AGO65289.1 DFPVTWQWWKWKGGCQELLGECSSRLGQMPPQRCRNIIQGSIQGDLGGIFGFQDRASK 119  
 ABB88759.1 DFPVTWQWWKWKGGCQELLGECSSRLGQMPPQRCRNIIQGSIQGDGGIFGFQDRASK 119  
 AER62832.1 DFPVTWQWWKWKGGCQELLGECSSRLGQMPPQRCRNIIQGSIQGDLGGIFGFQDRASK 120  
 ABD72477.1 DFPVTWQWWKWKGGCQELLGECSSRLGQMPPQRCRNIIQGSIQGDLGGIFGFQDRASK 120  
 ABB52757.1 DFPVTWQWWKWKGGCQELLGECSSRLGQMPPQRCRNIIQGSIQGDLGGIFGFQDRASK 92

AGO65289.1 VIQEAKNLPPKCNQGPACNIPGPGSGYYW 147  
 ABB88759.1 VIQEAKNLPPKCNQGPACNIPGPGSMYYW 147  
 AER62832.1 VIQEAKNLPPKCNQGPACIPSTSGYYW 148  
 ABD72477.1 VIQEAKNLPPKCNQGPACNIPGTIGYYW 148  
 ABB52757.1 VIQEAKNLPPKCNQGPACNIPGTIGYYW 120

- AGO65289.1 – secaloindoline a – (*x Triticosecale* Wittmack) cv. Wanad
- ABB88759.1 – puroindoline a – *Secale cereale* cv. Galma
- AER62832.1 – puroindoline a – *Elymus spicatus* (synonyms: *Pseudoroegneria spica* and *Agropyron spicatum*)
- ABD72477.1 – puroindoline a – *Triticum aestivum* cv. Chinese Spring
- ABB52757.1 – puroindoline a – *Aegilops sharonensis*

Sequence Distances of SINA.meg ClustalW (Slow/Accurate, Gonnet)

Percent Similarity in upper triangle  
 Percent Divergence in lower triangle

| Percent Identity |      |      |      |      |      |   |            |
|------------------|------|------|------|------|------|---|------------|
|                  | 1    | 2    | 3    | 4    | 5    |   |            |
| 1                | █    | 97.3 | 88.4 | 91.2 | 92.5 | 1 | AGO65289.1 |
| 2                | 2.8  | █    | 87.1 | 89.8 | 90.8 | 2 | ABB88759.1 |
| 3                | 12.6 | 14.2 | █    | 91.2 | 90.0 | 3 | AER62832.1 |
| 4                | 9.4  | 11.0 | 9.4  | █    | 98.3 | 4 | ABD72477.1 |
| 5                | 7.9  | 9.8  | 10.8 | 1.7  | █    | 5 | ABB52757.1 |
|                  | 1    | 2    | 3    | 4    | 5    |   |            |

Region: 36..135

1 mkaffffvall alvastafaq ysevgsydva ggggaqqcpl etklnsrnny llercstmkd  
 61 fpvtwqwwkw wkggcqellg eccsqlgqmp pqrcrniiqg siqgdllggif gfqdraskv  
 121 iqeaknlppk cnqgpacnipp gpsgyyw

Region\_name="AAI\_SS": Alpha-Amylase Inhibitors (AAIs) and Seed Storage (SS) Protein subfamily; composed of cereal-type AAIs and SS proteins.
